# Supplementary material
Source: Springer Nature journal article supplement (https://www.springermedizin.de/resource/supplementary/12891_2007_515_MOESM1_ESM.pdf/9511210)
Supplement: MOESM1 [file 9511210]

1246 patients  
Emergency Department

233 patients not eligible  
(39 dead, 41 dementia, 93 other  
region, 44 already on treatment,  
16 pathological fractures)

1013 patients

423 patients excluded  
(236 refused to participate,  
169 no DXA appointment,  
18 other)

590 patients  
Fracture and Osteoporosis  
Outpatient Clinic

419 patients with normal  
BMD or osteopenia, 71  
had no vitamin D  
measurement

100 patients
